# Supplementary material
Source: PubMed Central journal article supplement (PMC5389935)

**Figure S1**

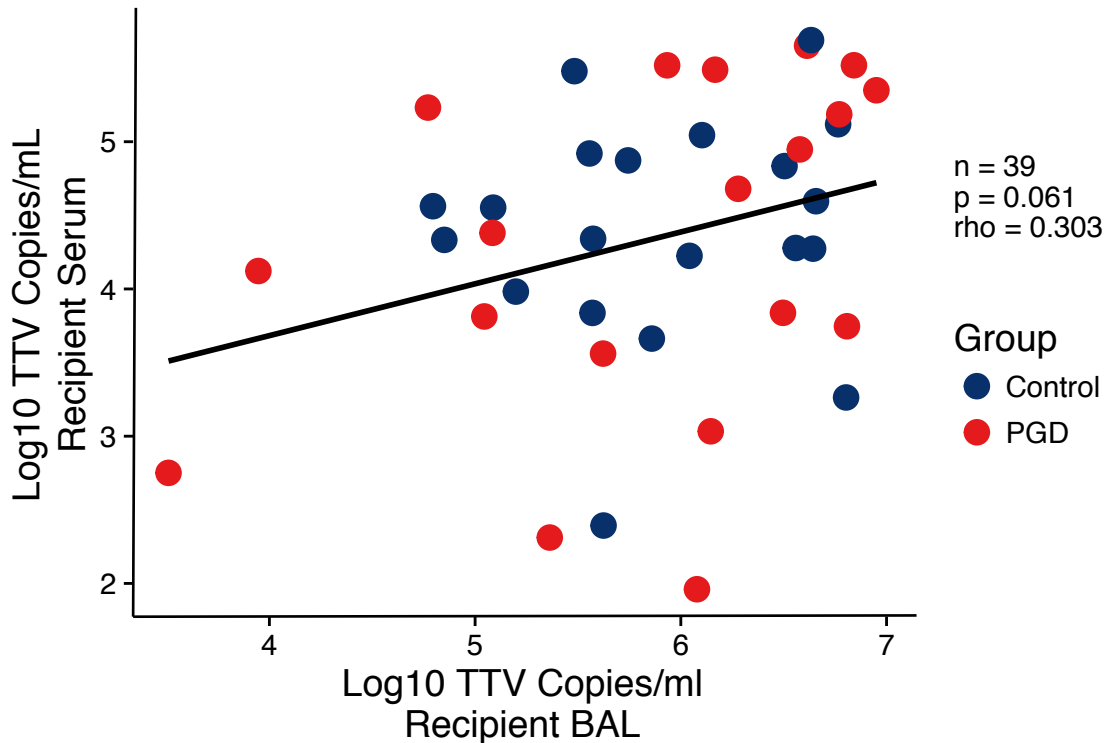

Figure S2

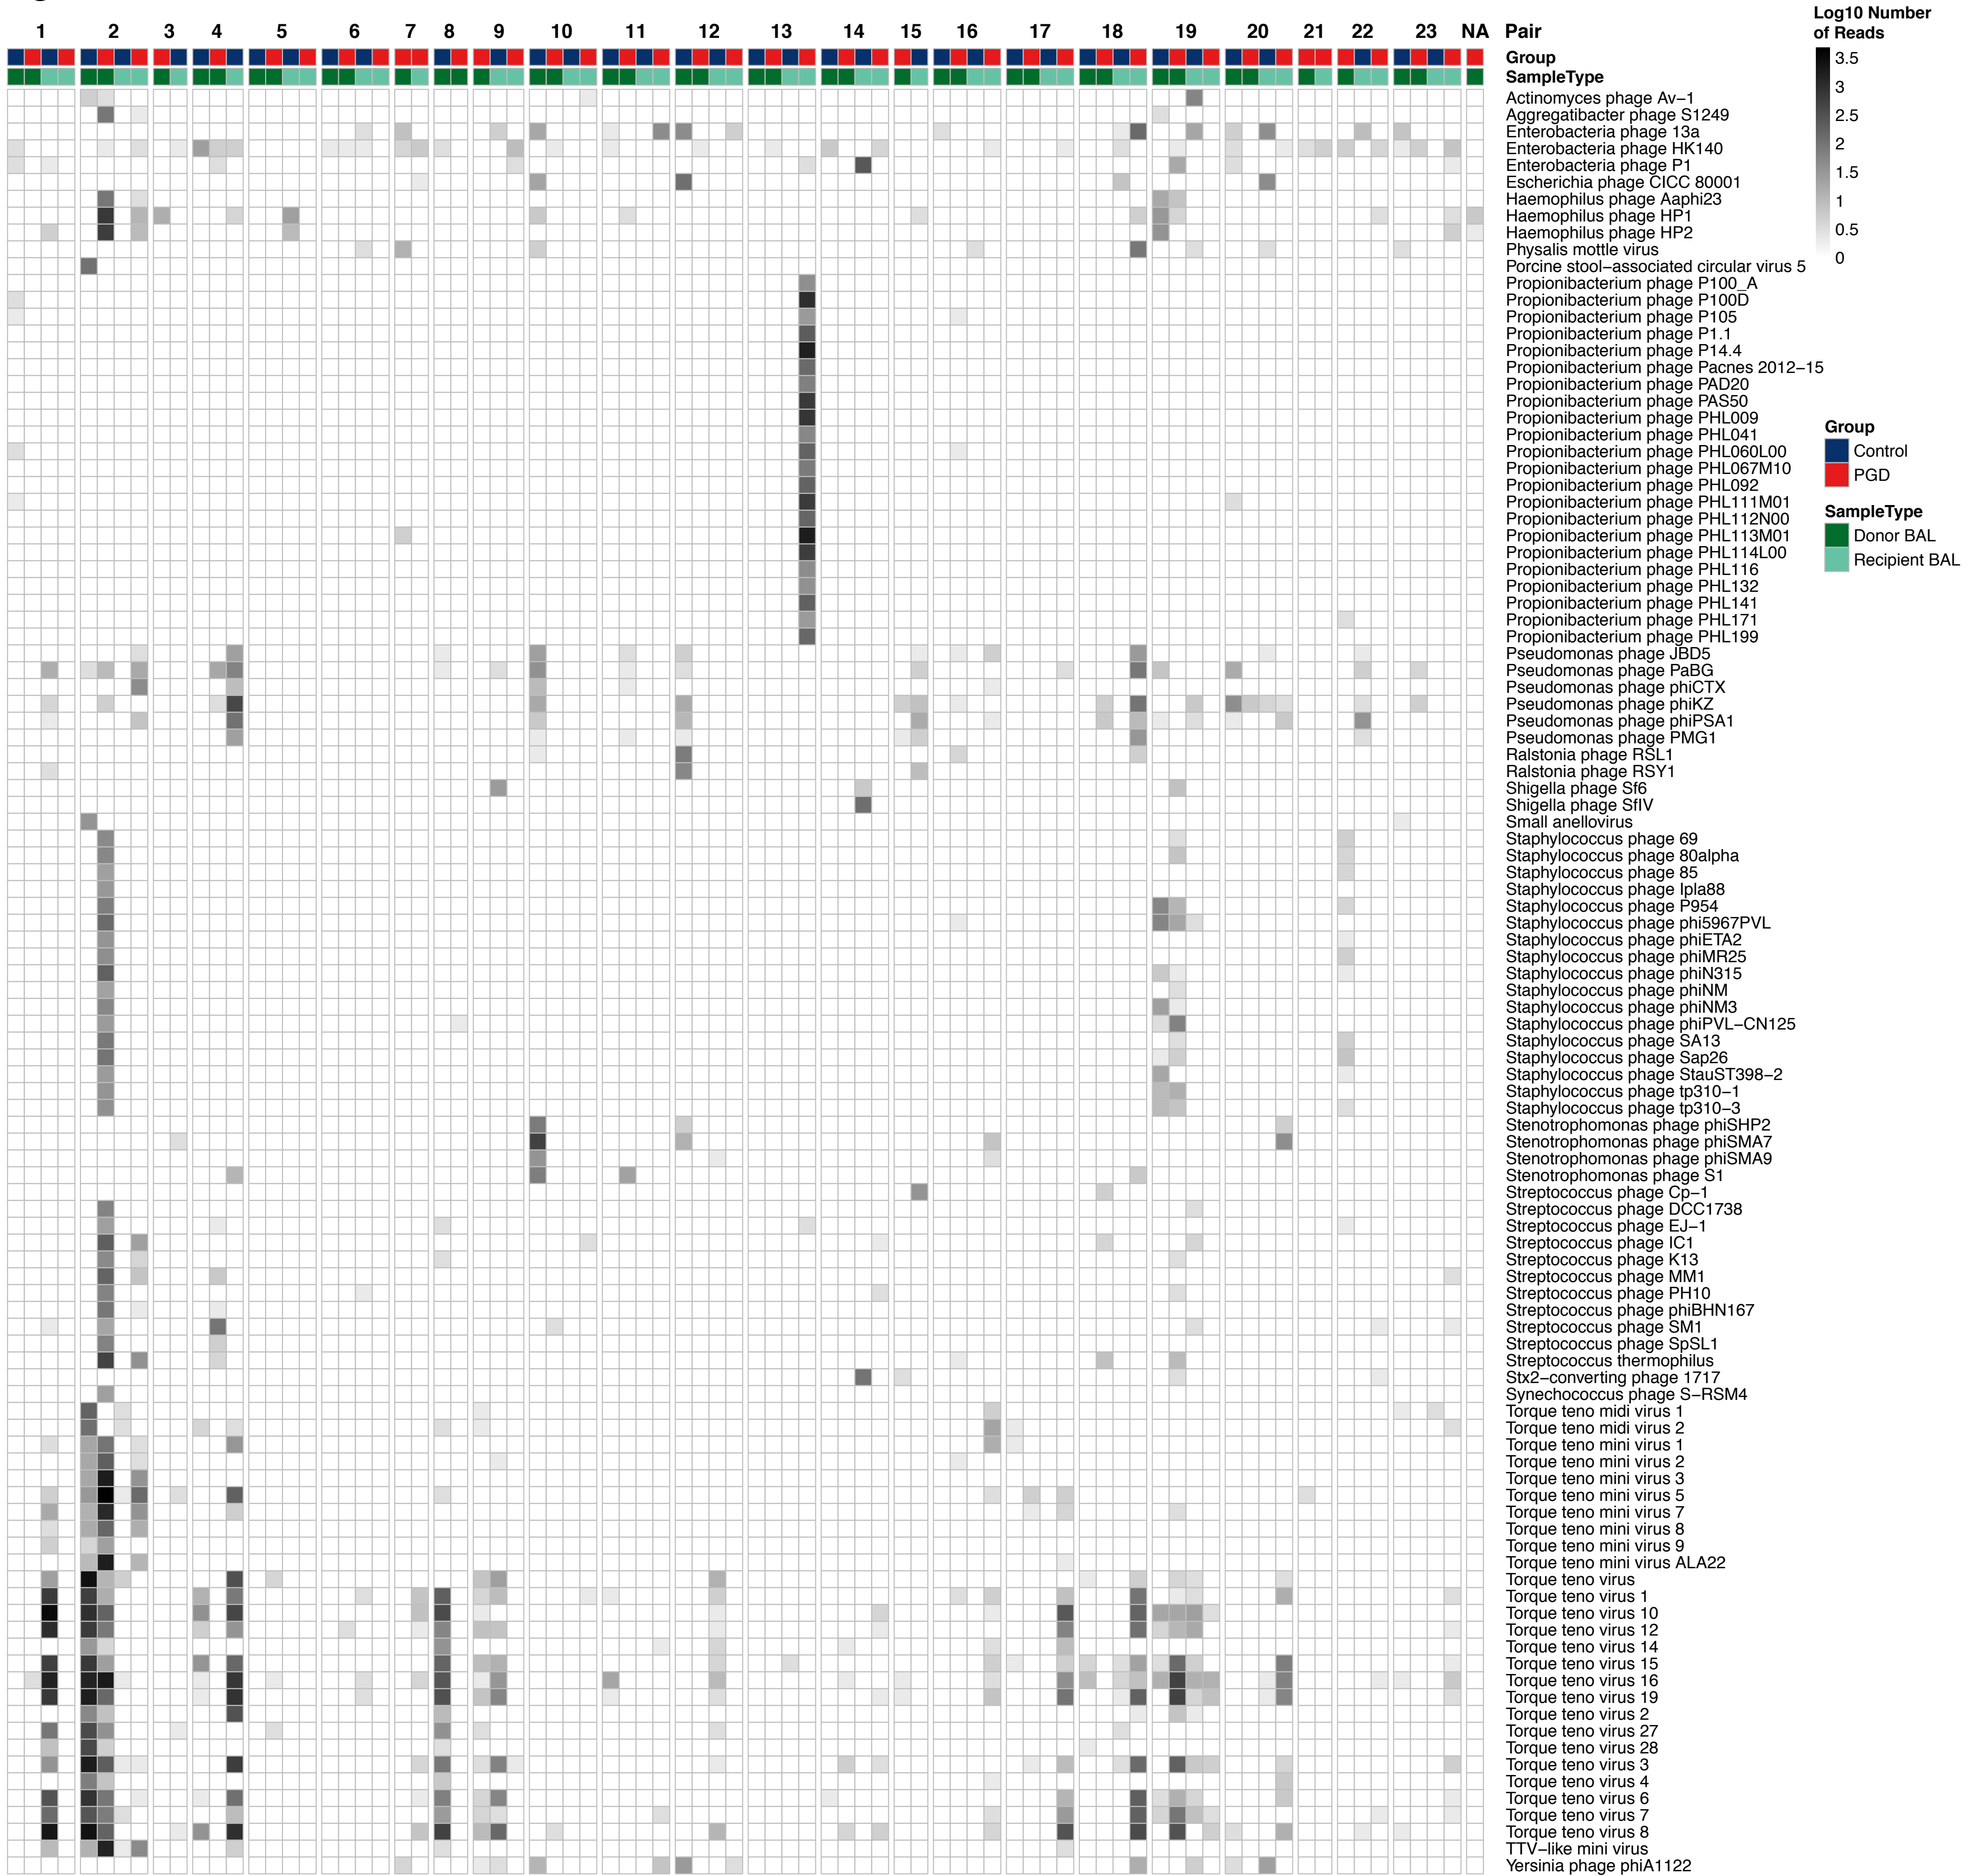

Supplement: NIHMS822897-supplement-Supp_Fig_S1-S2.pdf [file NIHMS822897-supplement-Supp_Fig_S1-S2.pdf]
